# Supplementary material for: Disease diagnosis in banana leaves: a review on AI powered techniques
Source: PeerJ journal article supplement (doi:10.7717/peerj-cs.3310), 2025-12-17
Supplement: banana_leaf_disease.xlsx [file banana_leaf_disease.xlsx]

## Sheet: Sheet1
Title	Year	Reference	Publisher	sources
AESA-Based IPM Package for Banana	2014	K. Satyagopal et al., AESA-Based IPM Package for Banana, 2014. [Online]. https://niphm.gov.in/IPMPackages/Banana.pdf	National Institute of Plant Health Management	Institutional Repository / Government Report
BANANA	[Online; no specific year]	"BANANA," National Horticulture Board. [Online]. https://nhb.gov.in/report_files/banana/BANANA.htm	National Horticulture Board	Government Website
Why Won't a Banana Plant's Leaves Open?	2013	J. Docken, "Why Won't a Banana Plant's Leaves Open?" SFGate, Sep. 2013.	SFGate	News Website
Thailand Supermarket Ditches Plastic Packaging for Banana Leaves	2019	T. Nace, "Thailand Supermarket Ditches Plastic Packaging for Banana Leaves," Forbes, Mar. 2019. [Online]. https://agritech.tnau.ac.in/crop_protection/crop_prot_crop%20diseases_fruits_banana.html	Forbes / TNAU Agritech	News / Institutional Website
Indonesia Import Data	[Online; no specific year]	"Indonesia Import Data," Indonesia Trade Data. [Online]. https://www.indonesiatradedata.com/blogs/export-import-data-of-banana-leaf-daun-pisang	Indonesia Trade Data	Commercial / Trade Website
Early Detection of Banana Leaf Disease Using Novel Deep CNN	2024	N. R. Rajalakshmi et al., “Early Detection of Banana Leaf Disease Using Novel Deep CNN,” J. Data Sci. Intell. Syst., 2024. doi:10.47852/bonviewJDSIS42021530	J. Data Sci. Intell. Syst.	Journal
AI in Agriculture — The Future of Farming	2024	A. Piddubna, “AI in Agriculture — The Future of Farming,” Intellias, 2024. [Online]. https://intellias.com/artificial-intelligence-in-agriculture/	Intellias	Corporate Blog / Website
Artificial intelligence helps banana growers protect the world’s most favorite fruit	2019	“Artificial intelligence helps banana growers protect the world’s most favorite fruit,” 2019. [Online]. https://www.preventionweb.net/news/artificial-intelligence-helps-banana-growers-protect-worlds-most-favorite-fruit	PreventionWeb	News / Government Portal
Mobile-Based DL Models for Banana Diseases Detection	2020	S. Sanga et al., “Mobile-Based DL Models for Banana Diseases Detection,” arXiv, 2020. doi:10.48550/arXiv.2004.03718	arXiv	Preprint Repository
Eumusae leaf spot disease	[Online; no specific year]	“Eumusae leaf spot disease.” [Online]. https://www.dpi.nsw.gov.au/biosecurity/plant/insect-pests-and-plant-diseases/eumusae-leaf-spot	DPI NSW	Government Portal
TNAU Agritech Portal: Crop Protection	[Online; no specific year]	“TNAU Agritech Portal: Crop Protection.” [Online]. https://agritech.tnau.ac.in/crop_protection/crop_diseases_postharvest_banana_1.html	TNAU Agritech	Institutional Website
Plant Diseases Caused by Bacteria - Narratives	[Online; no specific year]	G. Boudazin et al., Plant Diseases Caused by Bacteria - Narratives, American Phytopathological Society. [Online].	American Phytopathological Society	Professional Society / Website
Banana streak virus	2021	“Banana streak virus,” Wikipedia, 2021. [Online]. https://en.wikipedia.org/wiki/Banana_streak_virus	Wikipedia	Online Encyclopedia
Cordana leaf spot	[Online; no specific year]	“Cordana leaf spot	Improving the understanding of banana.” [Online]. https://promusa.org/Cordana+leaf+spot	ProMusa
Ensemble DL Classifier for Banana Leaf Disease Detection	2024	S. K. Nayak et al., “Ensemble DL Classifier for Banana Leaf Disease Detection,” in 2024 SSITCON, IEEE, 2024. doi:10.1109/SSITCON62437.2024.10796717	IEEE	Conference Proceedings
AI-powered banana diseases and pest detection	2019	M. G. Selvaraj et al., “AI-powered banana diseases and pest detection,” Plant Methods, 2019. doi:10.1186/s13007-019-0475-z	SpringerOpen	Journal
AI-based drone for early disease detection in cashew farming	2023	M. K. Rajagopal and B. Murugan, “AI-based drone for early disease detection in cashew farming,” arXiv, 2023. doi:10.48550/arxiv.2303.08556	arXiv	Preprint Repository
Fuzzy-Based Modified GAN and Faster RCNN for Banana Leaf Disease	2023	N. B. Raja and P. S. Rajendran, “Fuzzy-Based Modified GAN and Faster RCNN for Banana Leaf Disease,” J. Inst. Eng. India Ser. A, 2023. doi:10.1007/s40030-023-00743-8	Springer	Journal
Smart IoT system for banana plants disease detection	2023	A. N. S et al., “Smart IoT system for banana plants disease detection,” Multimed. Tools Appl., 2023. doi:10.1007/s11042-023-15442-6	Springer	Journal
Explainable AI Based framework for Banana Disease Detection	2024	B. Ashoka S, et al., “Explainable AI Based framework for Banana Disease Detection,” in 2024 ICITIIT, IEEE. doi:10.1109/ICITIIT61487.2024.10580364	IEEE	Conference Proceedings
Banana Plant Disease Detection-Hybrid ML Approach	2023	D. Thomas and J. M. David, “Banana Plant Disease Detection-Hybrid ML Approach,” in 2023 AICERA/ICIS, IEEE, 2023. doi:10.1109/AICERA/ICIS59538.2023.10420299	IEEE	Conference Proceedings
Morphological Analysis for Banana Disease Detection in Close Range Hyperspectral Remote Sensing Images	2019	W. Liao et al., “Morphological Analysis for Banana Disease Detection in Close Range Hyperspectral Remote Sensing Images,” in IGARSS 2019, IEEE, 2019. doi:10.1109/IGARSS.2019.8899087	IEEE	Conference Proceedings
Climate change effects on Black Sigatoka disease of banana	2019	D. P. Bebber, “Climate change effects on Black Sigatoka disease of banana,” Philos. Trans. R. Soc. B Biol. Sci., 2019. doi:10.1098/rstb.2018.0269	Royal Society	Journal
Information Systems Based on Computer Vision for the Control of Sigatoka Black Disease in Bananas	2023	M. Cárdenas-Rodríguez et al., “Information Systems Based on Computer Vision for the Control of Sigatoka Black Disease in Bananas,” in Communications in Computer and Information Science, Springer, 2023. doi:10.1007/978-3-031-45682-4_17	Springer Nature	Book Chapter / Conference Series
Estimating a novel stochastic model for within-field disease dynamics of banana bunchy top virus	2020	A. Varghese et al., “Estimating a novel stochastic model for within-field disease dynamics of banana bunchy top virus,” PLOS Comput. Biol., 2020. doi:10.1371/journal.pcbi.1007878	PLOS	Journal
Recognition of banana fusarium wilt based on UAV remote sensing	2020	H. Ye et al., “Recognition of banana fusarium wilt based on UAV remote sensing,” Remote Sensing, 2020. doi:10.3390/rs12060938	MDPI	Journal
Banana Fusarium Wilt Disease Detection from UAV-Based Multispectral Imagery	2022	S. Zhang et al., “Banana Fusarium Wilt Disease Detection from UAV-Based Multispectral Imagery,” Remote Sensing, 2022. doi:10.3390/rs14051231	MDPI	Journal
Banana diseases and insect infestations monitoring using multi-spectral camera RTK UAV images	2023	S. Choosumrong et al., “Banana diseases and insect infestations monitoring using multi-spectral camera RTK UAV images,” Spat. Inf. Res., 2023. doi:10.1007/s41324-022-00504-y	Springer	Journal
Early detection of black Sigatoka in banana leaves using hyperspectral images	2020	J. Ugarte Fajardo et al., “Early detection of black Sigatoka in banana leaves using hyperspectral images,” Appl. Plant Sci., 2020. doi:10.1002/aps3.11383	Wiley	Journal
Transforming Agro-Diagnostics: Banana Leaf Diseases Through Federated Learning CNNs	2024	S. Chattopadhyay et al., “Transforming Agro-Diagnostics: Banana Leaf Diseases Through Federated Learning CNNs,” in 2024 INOCON, IEEE, 2024. doi:10.1109/INOCON60754.2024.10512313	IEEE	Conference Proceedings
Navigating Agricultural Frontiers: Federated Learning CNNs for Banana Leaf Disease Resilience	2023	V. Sharma et al., “Navigating Agricultural Frontiers: Federated Learning CNNs for Banana Leaf Disease Resilience,” in 2023 ICSTCEE, IEEE, 2023. doi:10.1109/ICSTCEE60504.2023.10585265	IEEE	Conference Proceedings
Transforming Agricultural Diagnosis: Vision Transformer-Based Classification of Banana Leaf Diseases	2024	R. G. Tiwari, “Transforming Agricultural Diagnosis: Vision Transformer-Based Classification of Banana Leaf Diseases,” in 2024 ICIESTR, IEEE, 2024. doi:10.1109/ICIESTR60916.2024.10798372	IEEE	Conference Proceedings
Efficient Banana Leaf Disease Classification Using Vision Transformer (ViT) Model	2024	A. Saini, "Efficient Banana Leaf Disease Classification Using Vision Transformer (ViT) Model," in 2024 ICTACS, IEEE, 2024. doi:10.1109/ICTACS62700.2024.10841002	IEEE	Conference Proceedings
Classification of Banana Plant Leaves Based on Nutrient Deficiency Using Vision Transformer	2024	S. K. Sharma and D. K. Vishwakarma, “Classification of Banana Plant Leaves Based on Nutrient Deficiency Using Vision Transformer,” in 2024 INCET, IEEE, 2024. doi:10.1109/INCET61516.2024.10593120	IEEE	Conference Proceedings
Farming Crop in Health Analytics: Federated Learning CNNs in Banana Leaf Disease Detection	2024	A. Suryavanshi et al., “Farming Crop in Health Analytics: Federated Learning CNNs in Banana Leaf Disease Detection,” in 2024 INOCON, IEEE, 2024. doi:10.1109/INOCON60754.2024.10511447	IEEE	Conference Proceedings
Precision Phytopathology in Agriculture: A Federated Learning CNN Framework for Banana Leaf Disease Classification	2024	A. N. Shukla et al., “Precision Phytopathology in Agriculture: A Federated Learning CNN Framework for Banana Leaf Disease Classification,” in 2024 ICRITO, IEEE, 2024. doi:10.1109/ICRITO61523.2024.10522433	IEEE	Conference Proceedings
Effective Methods Based on Distinct Learning Principles for the Analysis of Hyperspectral Images to Detect Black Sigatoka Disease	2022	J. Ugarte Fajardo et al., “Effective Methods Based on Distinct Learning Principles for the Analysis of Hyperspectral Images to Detect Black Sigatoka Disease,” Plants, 2022. doi:10.3390/plants11192581	MDPI	Journal
Research on Banana Leaf Disease Detection Based on the Image Processing Technology	2022	H. Jianqing et al., “Research on Banana Leaf Disease Detection Based on the Image Processing Technology,” in 2022 CCET, IEEE, 2022. doi:10.1109/CCET55412.2022.9906377	IEEE	Conference Proceedings
An Image Segmentation Method for Banana Leaf Disease Image with Complex Background	2022	H. Jianqing et al., “An Image Segmentation Method for Banana Leaf Disease Image with Complex Background,” in 2022 DSIT, IEEE, 2022. doi:10.1109/DSIT55514.2022.9943850	IEEE	Conference Proceedings
Design and Implementation of a CNN Architecture to Classify Images of Banana Leaves with Diseases	2021	E. Correa et al., “Design and Implementation of a CNN Architecture to Classify Images of Banana Leaves with Diseases,” in 2021 ICA-ACCA, IEEE, 2021. doi:10.1109/ICAACCA51523.2021.9465178	IEEE	Conference Proceedings
Image Segmentation Algorithms for Banana Leaf Disease Diagnosis	2020	S. Deenan et al., “Image Segmentation Algorithms for Banana Leaf Disease Diagnosis,” J. Inst. Eng. India Ser. C, 2020. doi:10.1007/s40032-020-00592-5	Springer	Journal
Identification of Banana Leaf Diseases By Using Image Filtering Algorithm	2024	V. P. V. Prabhakar and N. Sudha, “Identification of Banana Leaf Diseases By Using Image Filtering Algorithm,” J. Electrical Systems, 2024. https://journal.esrgroups.org/jes/article/view/7292	ESR Groups	Journal
Detection of Black Sigatoka on Banana Tree Using Image Processing Techniques	–	S. P. Bhamare and S. C. Kulkarni, “Detection of Black Sigatoka on Banana Tree Using Image Processing Techniques,” IOSR J. Electron. Commun. Eng., –. www.iosrjournals.org	IOSR Journals	Journal
Impact of Image Pre-Processing in Image Quality and Segmentation for Banana Leaf Disease Prediction	2023	A. A and B. N, “Impact of Image Pre-Processing in Image Quality and Segmentation for Banana Leaf Disease Prediction,” in 2023 ICSCNA, IEEE, 2023. doi:10.1109/ICSCNA58489.2023.10370581	IEEE	Conference Proceedings
Banana Plant Disease Detection Using Image Processing	2024	P. Patil et al., “Banana Plant Disease Detection Using Image Processing,” in 2024 I2CT, IEEE, 2024. doi:10.1109/I2CT61223.2024.10543338	IEEE	Conference Proceedings
Performance Analysis of Pre-Processing Techniques in Plantain Tree Disease Classification With CNN	2021	M. Nandhini et al., “Performance Analysis of Pre-Processing Techniques in Plantain Tree Disease Classification With CNN,” in 2021 ICOEI, IEEE, 2021. doi:10.1109/ICOEI51242.2021.9452863	IEEE	Conference Proceedings
Determination of Leaf Degradation Percentage for Banana Leaves with Panama Disease Using Image Segmentation of Color Spaces and OpenCV	2023	N. C. Ibarra et al., “Determination of Leaf Degradation Percentage for Banana Leaves with Panama Disease Using Image Segmentation of Color Spaces and OpenCV,” in 2023 ICCAE, IEEE, 2023. doi:10.1109/ICCAE56788.2023.10111455	IEEE	Conference Proceedings
EM-ERNet for image-based banana disease recognition	2021	H. Lin et al., “EM-ERNet for image-based banana disease recognition,” J. Food Meas. Charact., 2021. doi:10.1007/s11694-021-01043-0	Springer	Journal
Transparent Intelligent Vision for Black Sigatoka Detection	2024	E. W. Kayanja et al., “Transparent Intelligent Vision for Black Sigatoka Detection,” in ICIVC 2023, Springer, 2024. doi:10.1007/978-3-031-71388-0_26	Springer Nature	Conference Proceedings / Book Chapter
Integration of Nondecimated Quaternion Wavelet Transform and Neighborhood Texture Patterns for Disease Classification in Banana (Musa spp.) Foliage		D. Mathew et al., “Integration of Nondecimated Quaternion Wavelet Transform and Neighborhood Texture Patterns for Disease Classification in Banana (Musa spp.) Foliage,” Multimed. Tools Appl., 2023. doi:10.1007/s11042-023-14869-1	Springer	Journal
Image Segmentation DL Model for Early Detection of Banana Diseases	2025	C. A. Elinisa et al., “Image Segmentation DL Model for Early Detection of Banana Diseases,” Appl. Artif. Intell., 2025. doi:10.1080/08839514.2024.2440837	Taylor & Francis	Journal
Banana Leaf Disease Detection Using GLCM-Based Feature Extraction and DCNN	2022	T. Mahendran and K. Seetharaman, “Banana Leaf Disease Detection Using GLCM-Based Feature Extraction and DCNN,” Journal of Positive School Psychology, 2022. https://journalppw.com/index.php/jpsp/article/view/13714	Journal PPW	Journal
Detection of Banana Plants and Their Major Diseases Through Aerial Images and ML Methods	2020	M. Gomez Selvaraj et al., “Detection of Banana Plants and Their Major Diseases Through Aerial Images and ML Methods,” ISPRS J. Photogramm. Remote Sens., 2020. doi:10.1016/j.isprsjprs.2020.08.025	Elsevier	Journal
Detection and Classification of Banana Leaf Diseases Using ML and DL Algorithms	2022	V. N. P and P. R, “Detection and Classification of Banana Leaf Diseases Using ML and DL Algorithms,” in 2022 INDICON, IEEE, 2022. doi:10.1109/INDICON56171.2022.10039912	IEEE	Conference Proceedings
Banana Leaf Disease Detection Using K-Means Clustering and Feature Extraction Techniques	2020	V. Chaudhari and M. Patil, “Banana Leaf Disease Detection Using K-Means Clustering and Feature Extraction Techniques,” in 2020 ICACCM, IEEE, 2020. doi:10.1109/ICACCM50413.2020.9212816	IEEE	Conference Proceedings
Interpretable Diagnosis of Banana Leaf Sigatoka Disease Using CNNs and Shapley Values	2023	A. Freire et al., “Interpretable Diagnosis of Banana Leaf Sigatoka Disease Using CNNs and Shapley Values,” in 2023 LA-CCI, IEEE, 2023. doi:10.1109/LA-CCI58595.2023.10409324	IEEE	Conference Proceedings
Detection of Banana Leaf and Fruit Diseases Using Neural Networks	2020	N. Saranya et al., “Detection of Banana Leaf and Fruit Diseases Using Neural Networks,” in 2020 ICIRCA, IEEE, 2020. doi:10.1109/ICIRCA48905.2020.9183006	IEEE	Conference Proceedings
Leaf Guard: Detecting the Diseases in Banana Leaf	2023	K. Yathurshan et al., “Leaf Guard: Detecting the Diseases in Banana Leaf,” in 2023 ICAC, IEEE, 2023. doi:10.1109/ICAC60630.2023.10417613	IEEE	Conference Proceedings
Comparative Analysis of Banana Leaf Disease Detection and Classification Methods	2022	N. B. Raja and P. Selvi Rajendran, “Comparative Analysis of Banana Leaf Disease Detection and Classification Methods,” in 2022 ICCMC, IEEE, 2022. doi:10.1109/ICCMC53470.2022.9753840	IEEE	Conference Proceedings
Analysis of Banana Plant Health Using ML Techniques	2024	J. D. Thiagarajan et al., “Analysis of Banana Plant Health Using ML Techniques,” Sci. Rep., 2024. doi:10.1038/s41598-024-63930-y	Nature	Journal
ML-Based Banana Leaf Disease Classification	2020	C. Pai and D. Naik, “ML-Based Banana Leaf Disease Classification,” vol. 07, no. 04, 2020	Unknown	Journal
Portable Sigatoka Spot Disease Identifier on Banana Leaves Using SVM	2021	G. L. H. Tuazon et al., “Portable Sigatoka Spot Disease Identifier on Banana Leaves Using SVM,” in 2021 HNICEM, IEEE, 2021. doi:10.1109/HNICEM54116.2021.9731808	IEEE	Conference Proceedings
Detection and Classification of Diseases of Banana Plant Using LBP and SVM	2019	A. Aruraj et al., “Detection and Classification of Diseases of Banana Plant Using LBP and SVM,” in 2019 ICSPC, IEEE, 2019. doi:10.1109/ICSPC46172.2019.8976582	IEEE	Conference Proceedings
Banana Leaf Disease Recognition Based on Local Binary Pattern	2022	V. Chaudhari et al., “Banana Leaf Disease Recognition Based on Local Binary Pattern,” in Smart Trends in Computing and Communications, Springer, 2022. doi:10.1007/978-981-16-4016-2_62	Springer Singapore	Book Chapter / LNNS
Classification of Banana Leaf Diseases Using Enhanced Gabor Feature Descriptor	2021	N. A. Brown Mary et al., “Classification of Banana Leaf Diseases Using Enhanced Gabor Feature Descriptor,” in Inventive Communication and Computational Technologies, Springer, 2021. doi:10.1007/978-981-15-7345-3_19	Springer Singapore	Book Chapter / LNNS
Detection of Black Sigatoka Disease Using ShuffleNet V2 CNN Architecture	2023	A. N. Yumang et al., “Detection of Black Sigatoka Disease Using ShuffleNet V2 CNN Architecture,” in 2023 ICCAE, IEEE, 2023. doi:10.1109/ICCAE56788.2023.10111367	IEEE	Conference Proceedings
CNN Method to Identify Banana Plant Diseases Using ResNet50 and VGG-19	2023	I. R. Syihad et al., “CNN Method to Identify Banana Plant Diseases Using ResNet50 and VGG-19,” J. RESTI, 2023. doi:10.29207/resti.v7i6.5000	Jurnal RESTI	Journal
Detection and Classification of Banana Leaf Disease Using Novel Segmentation and Ensemble ML Approach	2023	V. Chaudhari and M. P. Patil, “Detection and Classification of Banana Leaf Disease Using Novel Segmentation and Ensemble ML Approach,” Appl. Comput. Syst., 2023. doi:10.2478/acss-2023-0009	De Gruyter	Journal
Automatic Identification of Diseases in Grains Crops Through Computational Approaches: A Review	2020	R. Manavalan, “Automatic Identification of Diseases in Grains Crops Through Computational Approaches: A Review,” Computers and Electronics in Agriculture, 2020.	Elsevier	Journal
An Automated Segmentation and Classification Model for Banana Leaf Disease Detection	2022	K. V. Gokula et al., “An Automated Segmentation and Classification Model for Banana Leaf Disease Detection,” J. Appl. Biol. Biotechnol., 2022. doi:10.7324/jabb.2021.100126	JABB	Journal
Banana Plant Disease Classification Using Hybrid CNN	2022	K. L. Narayanan et al., “Banana Plant Disease Classification Using Hybrid CNN,” Computational Intelligence and Neuroscience, 2022. doi:10.1155/2022/9153699	Hindawi	Journal
Disease Detection in Banana Leaf Plants Using DenseNet and Inception Method	2022	A. Ridhovan et al., “Disease Detection in Banana Leaf Plants Using DenseNet and Inception Method,” Jurnal RESTI, 2022. doi:10.29207/resti.v6i5.4202	Jurnal RESTI	Journal
Leaf Disease Detection in Banana Plant Using Gabor Extraction and RCNN	2022	K. Seetharaman and T. Mahendran, “Leaf Disease Detection in Banana Plant Using Gabor Extraction and RCNN,” J. Inst. Eng. India Ser. A, 2022. doi:10.1007/s40030-022-00628-2	Springer	Journal
An Improved Agro DL Model for Detection of Panama Wilts Disease in Banana Leaves	2023	R. Sangeetha et al., “An Improved Agro DL Model for Detection of Panama Wilts Disease in Banana Leaves,” AgriEngineering, 2023. doi:10.3390/agriengineering5020042	MDPI	Journal
BananaSqueezeNet: Lightweight CNN for Diagnosis of Banana Leaf Diseases	2023	Md. A. B. Bhuiyan et al., “BananaSqueezeNet: Lightweight CNN for Diagnosis of Banana Leaf Diseases,” Smart Agricultural Technology, 2023. doi:10.1016/j.atech.2023.100214	Elsevier	Journal
Multi	2024	J. Deng et al., “Multi,” Journal of Integrative Agriculture, 2024. doi:10.1016/j.jia.2023.11.037	Elsevier	Journal
Mobile-Based CNN Model for Early Identification of Banana Diseases	2024	C. A. Elinisa and N. Mduma, “Mobile-Based CNN Model for Early Identification of Banana Diseases,” Smart Agricultural Technology, 2024. doi:10.1016/j.atech.2024.100423	Elsevier	Journal
Classification of Leaf Spot Diseases in Banana Using Pre-Trained CNNs	2023	D. Mathew et al., “Classification of Leaf Spot Diseases in Banana Using Pre-Trained CNNs,” in 2023 ICCC, IEEE, 2023. doi:10.1109/ICCC57789.2023.10165629	IEEE	Conference Proceedings
Precision Agriculture: Classifying Banana Leaf Diseases with Hybrid DL Models	2023	D. Banerjee et al., “Precision Agriculture: Classifying Banana Leaf Diseases with Hybrid DL Models,” in 2023 I2CT, IEEE, 2023. doi:10.1109/I2CT57861.2023.10126431	IEEE	Conference Proceedings
Implementing a Hybrid CNN-SVM Model for Banana Leaf Disease Classification	2023	V. Tanwar et al., “Implementing a Hybrid CNN-SVM Model for Banana Leaf Disease Classification,” in 2023 RMKMATE, IEEE, 2023. doi:10.1109/RMKMATE59243.2023.10369215	IEEE	Conference Proceedings
Eight Convolutional Layered DCNN Based Banana Leaf Disease Prediction	2022	M. S. Devi et al., “Eight Convolutional Layered DCNN Based Banana Leaf Disease Prediction,” in 2022 ICCCIS, IEEE, 2022. doi:10.1109/ICCCIS56430.2022.10037628	IEEE	Conference Proceedings
A Fine-Tuned CNN Model for Banana Leaf Disease Detection	2024	G. Singh et al., “A Fine-Tuned CNN Model for Banana Leaf Disease Detection,” in 2024 ICRITO, IEEE, 2024. doi:10.1109/ICRITO61523.2024.10522296	IEEE	Conference Proceedings
Faster R-CNN for Detection and Classification of Banana Leaf Diseases	2023	B. R. N and P. S. Rajendran, “Faster R-CNN for Detection and Classification of Banana Leaf Diseases,” in 2023 ICAEECI, IEEE, 2023. doi:10.1109/ICAEECI58247.2023.10370901	IEEE	Conference Proceedings
Enhancing Banana Leaf Spot Disease Classification Using Dense MobileNet V2	2024	M. K. Haq et al., “Enhancing Banana Leaf Spot Disease Classification Using Dense MobileNet V2,” in 2024 ACCAI, IEEE, 2024. doi:10.1109/ACCAI61061.2024.10602228	IEEE	Conference Proceedings
Banana Leaf Disease Detection Using Advanced CNN	2023	E. Mohanraj et al., “Banana Leaf Disease Detection Using Advanced CNN,” in 2023 ICSCSS, IEEE, 2023. doi:10.1109/ICSCSS57650.2023.10169485	IEEE	Conference Proceedings
Accurate Detection of Banana Xanthomonas Wilt Using UAV Images and Deep Learning	2024	J. J. Mora et al., “Accurate Detection of Banana Xanthomonas Wilt Using UAV Images and Deep Learning,” Discover Applied Sciences, 2024. doi:10.1007/s42452-024-06073-z	Springer	Journal
Performance Analysis of D-Neural Networks for Leaf Disease Classification	2022	J. Sujithra and M. F. Ukrit, “Performance Analysis of D-Neural Networks for Leaf Disease Classification,” Int. J. Syst. Assurance Eng. Manag., 2022. doi:10.1007/s13198-022-01756-5	Springer	Journal
A Lightweight CNN for Disease Detection of Fruit Leaves	2023	P. Hari and M. P. Singh, “A Lightweight CNN for Disease Detection of Fruit Leaves,” Neural Computing and Applications, 2023. doi:10.1007/s00521-023-08496-y	Springer	Journal
Utilizing Aerial Imagery and Deep Learning for Identifying Banana Plant Diseases	2024	M. Aliff et al., “Utilizing Aerial Imagery and Deep Learning for Identifying Banana Plant Diseases,” ITM Web of Conferences, 2024. doi:10.1051/itmconf/20246000013	EDP Sciences	Conference Proceedings
Banana Leaf Diseased Image Classification Using HEAP Autoencoder Deep Learning	2020	A. B. Mary et al., “Banana Leaf Diseased Image Classification Using HEAP Autoencoder Deep Learning,” Multimedia Tools and Applications, 2020. doi:10.1007/s11042-020-09521-1	Springer	Journal
Design and Evaluation of CNN for Banana Leaf Disease Classification	2020	A. Criollo et al., “Design and Evaluation of CNN for Banana Leaf Disease Classification,” in 2020 EIRCON, IEEE, 2020. doi:10.1109/EIRCON51178.2020.9254072	IEEE	Conference Proceedings
Banana Disease and Deficiency Detection Using YOLOv8	2025	S. R. Vinta et al., “Banana Disease and Deficiency Detection Using YOLOv8,” in Machine Vision and Augmented Intelligence, Springer, 2025. doi:10.1007/978-981-97-4359-9_42	Springer	Book Chapter / LN
Hierarchy in Disease Severity Classification in Banana Leaves Using CNN and Decision Tree Models	2024	R. Jain et al., “Hierarchy in Disease Severity Classification in Banana Leaves Using CNN and Decision Tree Models,” in 2024 INCET, IEEE, 2024. doi:10.1109/INCET61516.2024.10593446	IEEE	Conference Proceedings
Enhancing Banana Cultivation: Disease Identification Through CNN and SVM	2024	V. Thirumeninathan et al., “Enhancing Banana Cultivation: Disease Identification Through CNN and SVM,” in 2024 TQCEBT, IEEE, 2024. doi:10.1109/TQCEBT59414.2024.10545264	IEEE	Conference Proceedings
Deep Learning-Based Banana Plant Detection and Counting Using UAV RGB Images	2019	B. Neupane et al., “Deep Learning-Based Banana Plant Detection and Counting Using UAV RGB Images,” PLOS ONE, 2019. doi:10.1371/journal.pone.0223906	PLOS	Journal
Plant Disease Detection and Classification by Deep Learning	2019	M. H. Saleem et al., “Plant Disease Detection and Classification by Deep Learning,” Plants, 2019. doi:10.3390/plants8110468	MDPI	Journal
Effect of Data Augmentation on Detection of Black Sigatoka Using ShuffleNet V2 CNN	2024	J. M. Baguisi et al., “Effect of Data Augmentation on Detection of Black Sigatoka Using ShuffleNet V2 CNN,” in 2024 ICICT, IEEE, 2024. doi:10.1109/ICICT62343.2024.00051	IEEE	Conference Proceedings
Mask R-CNN Model for Banana Disease Segmentation	2024	C. A. Elinisa and N. Mduma, “Mask R-CNN Model for Banana Disease Segmentation,” in Artificial Intelligence Tools and Applications in Embedded and Mobile Systems, Springer, 2024. doi:10.1007/978-3-031-56576-2_20	Springer	Book Chapter / Progress in IS
Identification of Banana Leaf Diseases and Detection	2023	W. I. A. E. Altabaji et al., “Identification of Banana Leaf Diseases and Detection,” in 9th ICCST, Springer, 2023. doi:10.1007/978-981-19-8406-8_33	Springer	Conference Proceedings / LN
Identification of Banana Leaf Disease Based on KVA and GR-ARNet	2024	J. Deng et al., “Identification of Banana Leaf Disease Based on KVA and GR-ARNet,” Journal of Integrative Agriculture, 2024. doi:10.1016/j.jia.2023.11.037	Elsevier	Journal
Identification of banana leaf diseases: A collaboration of DL models	2024	A. Anushya and S. Shiwani, “Identification of banana leaf diseases: A collaboration of DL models,” in Recent Advancements in Artificial Intelligence, Springer, 2024. doi:10.1007/978-981-97-1111-6_25	Springer	Book Chapter
Transparent intelligent vision for Black Sigatoka detection	2024	E. W. Kayanja et al., “Transparent intelligent vision for Black Sigatoka detection,” in ICIVC, Springer, 2024. doi:10.1007/978-3-031-71388-0_26	Springer	Conference Proceedings
Banana plant counting and coverage percentage using remote sensing and DL	2024	S. Nieto et al., “Banana plant counting and coverage percentage using remote sensing and DL,” in Recent Developments in Geospatial Information Sciences, Springer, 2024. doi:10.1007/978-3-031-61440-8_12	Springer	Book Chapter / LN
Detection of banana leaf disease and its analysis using different techniques	2024	A. Jadhaw and R. Bhandari, “Detection of banana leaf disease and its analysis using different techniques,” Int. J. Computer Applications, 2024	Elsevier / Independent	Journal
Detection of Panama disease on banana leaves using YOLOv4	2023	N. C. Ibarra et al., “Detection of Panama disease on banana leaves using YOLOv4,” in 15th ICCAE, IEEE, 2023. doi:10.1109/ICCAE56788.2023.10111416	IEEE	Conference Proceedings
DL insights into banana Sigatoka disease: ResNext50 for seriousness classification	2024	P. Singh et al., “DL insights into banana Sigatoka disease: ResNext50 for seriousness classification,” in IEEE IATMSI, 2024. doi:10.1109/IATMSI60426.2024.10503074	IEEE	Conference Proceedings
DL meets support vector machines: Hybrid model for banana leaf wilt severity assessment	2024	M. Kumar and A. Kumar, “DL meets support vector machines: Hybrid model for banana leaf wilt severity assessment,” in 2nd ICDT, IEEE, 2024. doi:10.1109/ICDT61202.2024.10489081	IEEE	Conference Proceedings
DL model for detection and classification of banana diseases based on leaf images	2024	S. Nassor et al., “DL model for detection and classification of banana diseases based on leaf images,” IOP Conf. Ser.: Earth Environ. Sci., 2024. doi:10.1088/1755-1315/1359/1/012010	IOP	Conference Proceedings
DL model for classifying Black Sigatoka based on infection stages	2024	E. Kambo et al., “DL model for classifying Black Sigatoka based on infection stages,” Indian J. Sci. Technol., 2024. doi:10.17485/IJST/v17i37.2453	Springer / SAGE	Journal
Multivariate SVM integrated with CNN for banana tree disease identification	2022	P. Senthilraj and D. P. Parameswari, “Multivariate SVM integrated with CNN for banana tree disease identification,” J. Pharm. Negative Results, 2022	Elsevier / Independent	Journal
TL-based deep CNN for detection of Fusarium wilt in banana crops	2023	K. Yan et al., “TL-based deep CNN for detection of Fusarium wilt in banana crops,” Preprints, 2023. doi:10.20944/preprints202309.1681.v1	Preprints	Preprint
Banana disease classification using TL	2024	M. I. F. M. Derafi et al., “Banana disease classification using TL,” in IEEE ISIEA, 2024. doi:10.1109/ISIEA61920.2024.10607219	IEEE	Conference Proceedings
Comparative analysis on TL models to classify banana diseases	2024	Y. Salehin et al., “Comparative analysis on TL models to classify banana diseases,” in 2nd InCACCT, IEEE, 2024. doi:10.1109/InCACCT61598.2024.10551036	IEEE	Conference Proceedings
Sigatoka and Xanthomonas banana leaf disease detection via TL	2024	Y. H. Genet et al., “Sigatoka and Xanthomonas banana leaf disease detection via TL,” Scientia Iranica, 2024. doi:10.24200/sci.2024.62306.7766	Elsevier	Journal
Augmented insights: Evaluation of DL for banana leaf spot detection	2024	P. K. Priya et al., “Augmented insights: Evaluation of DL for banana leaf spot detection,” in SASI-ITE, IEEE, 2024. doi:10.1109/SASI-ITE58663.2024.00024	IEEE	Conference Proceedings
DL-based dual-channel banana grading system using CNN	2022	S. R. et al., “DL-based dual-channel banana grading system using CNN,” J. Food Quality, 2022. doi:10.1155/2022/6050284	Hindawi	Journal
Detection and classification of defects on exported banana leaves by computer vision	2019	D. T. Dat et al., “Detection and classification of defects on exported banana leaves by computer vision,” in ICSSE, IEEE, 2019. doi:10.1109/ICSSE.2019.8823097	IEEE	Conference Proceedings
Multi-level banana plant disease diagnosis with score and model fusion	2024	J. Lopez et al., “Multi-level banana plant disease diagnosis with score and model fusion,” in ICCAD, IEEE, 2024. doi:10.1109/ICCAD60883.2024.10554044	IEEE	Conference Proceedings
BananaLSD: Dataset for classification of banana leaf diseases using ML	2023	S. E. Arman et al., “BananaLSD: Dataset for classification of banana leaf diseases using ML,” Data Brief, 2023. doi:10.1016/j.dib.2023.109608	Elsevier	Journal / Dataset
PSFD-Musa: Dataset of banana plant, stem, fruit, leaf, and disease	2022	E. Medhi and N. Deb, “PSFD-Musa: Dataset of banana plant, stem, fruit, leaf, and disease,” Data Brief, 2022. doi:10.1016/j.dib.2022.108427	Elsevier	Journal / Dataset
Global banana leaves export import trade data	2023	Eximpedia Export Import Trade, “Global banana leaves export import trade data,” Eximpedia, 2023. [Online]. Available: https://www.eximpedia.app/products/banana-leaves-import-export-data	Eximpedia	Website / Online Data
DenseNet201Plus: Cost-effective transfer-learning architecture for rapid leaf disease identification with attention mechanisms	2024	M. K. A. Mazumder et al., “DenseNet201Plus: Cost-effective transfer-learning architecture for rapid leaf disease identification with attention mechanisms,” Heliyon, 2024. doi:10.1016/j.heliyon.2024.e35625	Elsevier	Journal
Using transfer learning-based plant disease classification and detection for sustainable agriculture	2024	W. Shafik et al., “Using transfer learning-based plant disease classification and detection for sustainable agriculture,” BMC Plant Biology, 2024. doi:10.1186/s12870-024-04825-y	BMC / Springer	Journal
VGG16-AttnNet: A banana leaf lesion recognition model combining VGG16 and self-attention mechanism	2024	Y. Huang et al., “VGG16-AttnNet: A banana leaf lesion recognition model combining VGG16 and self-attention mechanism,” in ICBASE, 2024. doi:10.1109/ICBASE63199.2024.10762417	IEEE	Conference Proceedings
Classification of banana leaf diseases using a GoogleNet-based CNN architecture	2025	N. Arifin, “Classification of banana leaf diseases using a GoogleNet-based CNN architecture,” Krisnadana Journal, 2025. doi:10.58982/krisnadana.v4i2.749	Independent / Journal	Journal
ResNet50: Deep learning method for automated detection of banana leaf spot diseases	2024	P. Nasra and S. Gupta, “ResNet50: Deep learning method for automated detection of banana leaf spot diseases,” in ICICEC, IEEE, 2024. doi:10.1109/ICICEC62498.2024.10808847	IEEE	Conference Proceedings
CST: Convolutional Swin Transformer for detecting the degree and types of plant diseases	2022	Y. Guo et al., “CST: Convolutional Swin Transformer for detecting the degree and types of plant diseases,” Computers and Electronics in Agriculture, 2022. doi:10.1016/j.compag.2022.107407	Elsevier	Journal
Climate change effects on Black Sigatoka disease of banana	2019	D. P. Bebber, "Climate change effects on Black Sigatoka disease of banana," Philosophical Transactions of the Royal Society B, 2019. [Online]. Available: http://dx.doi.org/10.1098/rstb.2018.0269	Royal Society	Journal
Black Sigatoka: An Increasing Threat to Banana Cultivation	2003	D. H. Marín et al., "Black Sigatoka: An Increasing Threat to Banana Cultivation," Plant Disease, 2003. doi:10.1094/PDIS.2003.87.3.208	APS	Journal
Black Sigatoka Classification Using Convolutional Neural Networks	2022	C. A. Escudero et al., "Black Sigatoka Classification Using Convolutional Neural Networks," Int. J. Machine Learning and Computing, 2022	Independent / Journal	Journal
Development of a digital image classification system to support technical assistance for Black Sigatoka detection	2021	C. A. Escudero et al., “Development of a digital image classification system to support technical assistance for Black Sigatoka detection,” Revista Brasileira de Fruticultura, 2021. doi:10.1590/0100-29452020681	Springer / Journal	Journal
Effective Methods Based on Distinct Learning Principles for Hyperspectral Images to Detect Black Sigatoka Disease	2022	F. Ugarte Fajardo et al., "Effective Methods Based on Distinct Learning Principles for Hyperspectral Images to Detect Black Sigatoka Disease," Applied Sciences, 2022	MDPI	Journal
Genetic improvement for resistance to black sigatoka in bananas: A systematic review	2021	J. M. S. Soares et al., "Genetic improvement for resistance to black sigatoka in bananas: A systematic review," Front. Plant Sci., 2021. doi:10.3389/fpls.2021.657916	Frontiers	Journal
Image Segmentation Deep Learning Model for Early Detection of Banana Diseases	2025	C. A. Elinisa et al., "Image Segmentation Deep Learning Model for Early Detection of Banana Diseases," Applied Artificial Intelligence, 2025. doi:10.1080/08839514.2024.24408	Taylor & Francis	Journal
Detection of Leaf Diseases in Banana Crops Using Deep Learning Techniques	2025	N. Jiménez et al., “Detection of Leaf Diseases in Banana Crops Using Deep Learning Techniques,” AI, 2025. doi:10.3390/ai6030061	MDPI	Journal
Analysis for Detecting Banana Leaf Disease Using CNN Method	2025	N. Helmawati & E. Utami, “Analysis for Detecting Banana Leaf Disease Using CNN Method,” JUITA: Jurnal Informatika, 2025. doi:10.30595/juita.v13i1.24514	Independent / Journal	Journal
Comparison of color-based feature extraction methods in banana leaf diseases classification using SVM and K-NN	2021	S. Sholehah & S. Ali, “Comparison of color-based feature extraction methods in banana leaf diseases classification using SVM and K-NN,” Indonesian Journal of Electrical Engineering and Computer Science, 2021. doi:10.11591/IJEECS.V24.I3.PP1523-1533	IEEE	Journal
Sigatoka and xanthomonas Banana leaf disease detection via transfer learning	2024	Y. H. Genet et al., “Sigatoka and xanthomonas Banana leaf disease detection via transfer learning,” Scientia Iranica, 2024. doi:10.24200/sci.2024.62306.7766	Elsevier	Journal
Analysis for Detecting Banana Leaf Disease Using CNN Method	2025	N. Helmawati & E. Utami, “Analysis for Detecting Banana Leaf Disease Using CNN Method,” JUITA: Jurnal Informatika, 2025	Independent / Journal	Journal
Banana Leaf Disease Classification Using SqueezeNet, AlexNet and MobileNet	2025	M. Z. Chong et al., “Banana Leaf Disease Classification Using SqueezeNet, AlexNet and MobileNet,” Journal of Electronic Voltage and Application, 2025	Independent / Journal	Journal
A YOLOv10-based Approach for Banana Leaf Disease Detection	2025	R. Alanazi, “A YOLOv10-based Approach for Banana Leaf Disease Detection,” Engineering, Technology & Applied Science Research, 2025. doi:10.48084/etasr.11138	Independent / Journal	Journal
Banana disease classification using transfer learning	2024	M. I. F. M. Derafi et al., “Banana disease classification using transfer learning,” in IEEE ISIEA, 2024	IEEE	Conference Proceedings
BananaLSD: Banana leaf images dataset for classification using ML	2023	S. E. Arman et al., “BananaLSD: Banana leaf images dataset for classification using ML,” Data in Brief, 2023. doi:10.1016/j.dib.2023.109608	Elsevier	Journal / Dataset
Banana Leaf Disease Images	2021	Y. Hailu, “Banana Leaf Disease Images,” Mendeley Data, 2021. doi:10.17632/rjykr62kdh.1	Mendeley	Dataset
The Nelson Mandela African Institution of Science and Technology Bananas dataset	2022	N. Mduma et al., “The Nelson Mandela African Institution of Science and Technology Bananas dataset,” Harvard Dataverse, 2022. doi:10.7910/DVN/LQUWXW	Harvard Dataverse	Dataset
Banana Disease Recognition Dataset	2023	M. M. H. Mafi et al., “Banana Disease Recognition Dataset,” Mendeley Data, 2023. doi:10.17632/79w2n6b4kf.1	Mendeley	Dataset
Banana and Banana Leaf Dataset for Classification and Disease Detection	2025	U. Das et al., “Banana and Banana Leaf Dataset for Classification and Disease Detection,” Mendeley Data, 2025. doi:10.17632/5nfjzntwd8.2	Mendeley	Dataset
Banana Leaves Imagery Dataset	2025	N. Mduma & C. Elinisa, “Banana Leaves Imagery Dataset,” Sci Data, 2025. doi:10.1038/s41597-025-04456-4	Springer Nature	Dataset
Mobile phone–based deep learning model for detecting banana diseases and pests in smallholder farms	2019	M. Marcel et al., “Mobile phone–based deep learning model for detecting banana diseases and pests in smallholder farms,” Plant Methods, 2019. doi:10.1186/s13007-019-0475-z	Springer	Journal
Detection of banana plants and their major diseases through aerial images and ML methods	2020	M. Gomez Selvaraj et al., “Detection of banana plants and their major diseases through aerial images and ML methods,” ISPRS Journal of Photogrammetry and Remote Sensing, 2020. doi:10.1016/j.isprsjprs.2020.08.025	Elsevier	Journal
Enhancing Banana Leaf Disease Diagnosis Using Explainable AI on a Simple Convolutional Neural Network	2025	Bharath, A. R., Hemalatha, N., & Sreekumar, K. M. (2025). Enhancing banana leaf disease diagnosis using explainable AI on a simple convolutional neural network. International Journal of Innovative Research and Technology, 12, 106–110.	IJIRT	Journal
Incorporating Deep Learning into the Diagnosis of Banana Leaf Spot Diseases for the Protection of Banana Crops	2024	Ünal, C. (2024). Incorporating deep learning into the diagnosis of banana leaf spot diseases for the protection of banana crops. SSRN. https://ssrn.com/abstract=4904473	Elsevier	Journal
